# Supplementary material for: A dual-heteroatom–lanthanide cluster-embedded polyoxotungstate for sequential fluorescence detection of Fe3+ and pyrophosphate
Source: Royal Society of Chemistry journal article supplement (doi:10.1039/d4qi00991f), 2024-01-01
Supplement: d4qi00991f1.pdf [file d4qi00991f1.pdf]

## Supporting Information

### **A dual-heteroatom–lanthanide cluster-embedded polyoxotungstate for sequential fluorescence detection of Fe<sup>3+</sup> and pyrophosphate**

Siyu Zhang,<sup>‡a,b</sup> Tiantian Gong,<sup>‡b</sup> Chenyun Liu,<sup>a,b</sup> Qiuyu Wang,<sup>b</sup> Fuxiu Chen,<sup>b</sup> Jiancai Liu,<sup>\*a,b</sup> Lijuan Chen,<sup>\*b</sup> Junwei Zhao<sup>\*a,b</sup>

<sup>a</sup>*School of Energy Science and Technology, Henan University, Zhengzhou, Henan 450046, People's Republic of China. E-mail: liujiancai@henu.edu.cn*

<sup>b</sup>*Henan Key Laboratory of Polyoxometalate Chemistry, College of Chemistry and Chemical Engineering, Henan University, Kaifeng, Henan 475004, People's Republic of China. E-mail: ljchen@henu.edu.cn, zhaojunwei@henu.edu.cn*

**Fig. S1** Structures of some representative dual-HA-directed HPOTs, where HAs work as discrete linkers or cluster linkers.

**Fig. S2** The IR spectrum of **1**.

**Fig. S3** The TG curve of **1**.

**Fig. S4** Comparison of the simulative and experimental PXRD patterns of **1**.

**Fig. S5** Highlighting the bridging O atoms in connecting the dimeric midbody and  $[\text{BiW}_3(\text{H}_2\text{O})\text{O}_{11}]^-$  moiety.

**Fig. S6** The  $[\text{EuTe}_2\text{O}_3]^{5+}$  cluster showing a folded quadrangle-shaped motif along "Eu1–O3" line.

**Fig. S7** The almost coplanar arrangement of two  $\text{Te}^{\text{IV}}$  and two  $\text{Bi}^{\text{III}}$  atoms with  $\text{Eu}^{13+}$  ion located above the plane with a distance of 1.992 Å.

**Fig. S8** Coordination environments of  $\text{Bi}^{3\text{III}}$ – $\text{Bi}^{5\text{III}}$  atoms.

**Fig. S9** Coordination environments of  $\text{Te}^{1\text{IV}}$  and  $\text{Te}^{2\text{IV}}$  atoms.

**Fig. S10** Coordination geometries of  $\text{Eu}^{13+}$  and  $\text{Eu}^{23+}$  ions.

**Fig. S11** (a) The stacking structure of **1a**. (b) The simplified diagram of stacking structure of **1a**. (c) The repeating unit in each layer. Symmetry code: A ( $2 - x, 1.5 + y, 1.5 - z$ ), B ( $2 + x, 2.5 - y, 1.5 + z$ ), C ( $2 - x, 2 - y, 2 - z$ ), D ( $2 + x, 1 + y, 1 + z$ ).

**Fig. S12** The ESI-MS spectrum of **1** in aqueous solution.

**Fig. S13** (a) The emission spectrum of **1** in aqueous solution ( $\lambda_{\text{ex}} = 397 \text{ nm}$ ). (b) The excitation spectrum of **1** in aqueous solution ( $\lambda_{\text{em}} = 620 \text{ nm}$ ). (c) The luminescence decay curve of **1** by monitoring the emission at 620 nm in aqueous solution.

**Fig. S14** Time-dependent PL emission of **1** in water.

**Fig. S15** Fluorescence responses of the **1**-based sensor towards  $\text{Fe}^{3+}$  and other ions.

**Fig. S16** Overlap between the UV–vis absorption spectra of  $\text{FeCl}_3$  and the excitation spectra of **1**.

**Fig. S17** Fluorescence responses of the  $\text{Fe}^{3+}$ -quenched system with different anions.

**Fig. S18** (a) Lifetime decay curves of the  $\text{Fe}^{3+}$ -quenched system under different concentrations of PPI. (b) Lifetime decay curves of **1** under different concentrations of PPI.

**Fig. S19** (a) Time scan of the PL response of **1** towards the addition of  $\text{Fe}^{3+}$  (400  $\mu\text{M}$ ). (b) Time scan of the PL response of  $\text{Fe}^{3+}$ -quenched system towards the addition of PPI (800  $\mu\text{M}$ ).

**Table S1.** X-ray diffraction crystallographic data and structure refinements for **1**.

**Table S2.** Assignment of peaks with proposed formula and charges.

**Table S3.** The standard deviation for the **1**-based fluorescence sensor.

**Table S4.** Detection results of  $\text{Fe}^{3+}$  by **1**-based fluorescence sensor in real samples.

**Table S5.** Decay lifetimes of the **1**-based sensor under different concentrations of  $\text{Fe}^{3+}$ .

**Table S6.** The standard deviation for the  $\text{Fe}^{3+}$ -quenched system.

**Table S7.** Comparisons of the FL detection for  $\text{Fe}^{3+}$  and PPI by using **1**-based sensor with some reported results.

**Table S8.** Decay lifetimes of the  $\text{Fe}^{3+}$ -quenched system under different concentrations of PPI.

**Table S9.** Decay lifetimes of the **1**-based sensor under different concentrations of PPI.

**Table S10.** Detection results of PPI in human serum sample by using  $\text{Fe}^{3+}$ -quenched system.

## Materials and physical measurements

All chemicals were commercially available and used without further purification. C, H and N elemental analyses were performed on a Perkin–Elmer 2400–II CHNS analyzer. Inductively coupled plasma-atomic emission spectroscopy (ICP–AES) analyses were performed on a Perkin–Elmer Optima 2000DV ICP–AES spectrometer. Fourier Transform Infrared (FT-IR) spectrum was received from solid samples palletized with KBr on BRUKER TENSOR II FT-IR spectra spectrometer between 4000–400  $\text{cm}^{-1}$ . Thermogravimetric (TG) analysis was measured on a Bruker Tensor–II TGA instrument under the  $\text{N}_2$  atmosphere with a heating rate of 10  $^\circ\text{C}/\text{min}$  in the temperature range of 25–1000  $^\circ\text{C}$ . Powder X-ray diffraction (PXRD) data were recorded on a Bruker D8 ADVANCE apparatus using  $\text{Cu K}\alpha$  radiation ( $\lambda = 1.54056 \text{ \AA}$ ) in a scan range ( $2\theta$ ) of 5–50 $^\circ$  at 293 K. Electrospray ionization mass spectrometry (ESI-MS) tests were performed on an AB SCIEX Triple TOF 4600 spectrometer operating in negative-ion mode and the data was analyzed using the Peakview 2.0 software provided. UV-vis spectra were recorded on an UV-6100 double beam spectrophotometer in the range of 190–500 nm in aqueous solution. Photoluminescence (PL) spectra were investigated by Edinburgh FLS 980 Analytical Instrument apparatus with 450 W Xe-lamp as excitation source, and the PL decay lifetime curves were monitored by using the  $\mu\text{F900H}$  high-energy microsecond flash lamp.

## X-ray crystallography

The diffraction data of **1** were collected on a Bruker D8 Venture Photon II diffractometer equipped with CCD two-dimensional detector using monochromated  $\text{Mo K}\alpha$  radiation ( $\lambda = 0.71073 \text{ \AA}$ ) at 150 K. Routine Lorentz and polarization corrections were applied and a multi-scan absorption correction was utilized with the SADABS program. The structures were solved using direct methods, and refined on  $F^2$  by full-matrix least-squares method with the assistance of SHELXTL–97 program. All H atoms coordinated with N and C atoms were generated geometrically and refined isotropically as a riding model using the default SHELXTL parameters. No H atoms associated with water molecules are located from the difference Fourier map. All non-H atoms are refined anisotropically. Besides, one  $[\text{H}_2\text{N}(\text{CH}_3)_2]^+$  cation, one  $\text{Na}^+$  cation and 25 lattice water molecules were directly added into the molecular formula of **1** based on charge balance requirement, elemental and TG analyses. The crystallographic data and structure refinements for **1** are listed in Table S1. Crystallographic data and structure refinements for **1** reported in this paper have been deposited in the Cambridge Crystallographic Data Centre with CCDC 2335445 for **1**. These data can be obtained free of charge from the Cambridge Crystallographic Data Centre via [www.ccdc.cam.ac.uk/data\\_request/cif](http://www.ccdc.cam.ac.uk/data_request/cif).

## Synthesis of $[\text{H}_8\text{BTHMMAP}]_{1.5}[\text{H}_2\text{N}(\text{CH}_3)_2]_4\text{Na}_3\text{H}[\text{Eu}_2\text{Bi}_3(\text{Hpdca})_3(\text{H}_2\text{O})_3\text{Te}_2\text{W}_3\text{O}_{14}][(\text{W}_5\text{O}_{18})(\text{B}-\alpha\text{-BiW}_9\text{O}_{33})_2]\cdot 44\text{H}_2\text{O}$ (**1**)

$\text{Na}_2\text{WO}_4\cdot 2\text{H}_2\text{O}$  (3.401 g, 10.311 mmol),  $\text{K}_2\text{TeO}_3$  (0.130 g, 0.512 mmol), dimethylamine hydrochloride (0.705 g, 8.645 mmol), 1,3-bis[tris(hydroxymethyl)methylamino]propane ( $\text{H}_6\text{BTHMMAP}$ , 0.200 g, 0.712 mmol), 2-pyridinecarboxylic acid (0.202 g, 1.641 mmol) were dissolved in 30 mL distilled water under stirring. Then  $\text{Bi}(\text{NO}_3)_3\cdot 5\text{H}_2\text{O}$  (0.201 g, 0.412 mmol) was dissolved in 1 mL hydrochloric acid (6 M) and added drop by drop to the above solution, and the pH of the solution was adjusted to 6.0 by 6 M HCl. Subsequently,  $\text{Eu}(\text{NO}_3)_3\cdot 6\text{H}_2\text{O}$  (0.400 g, 0.897 mmol) was added to the solution and the final pH of the solution was kept about 5.30 using 4 M NaOH. The solution was heated at 90  $^\circ\text{C}$  for 2 h, then cooled to room temperature and filtered. Slow evaporation of the filtrate led to colorless block

crystals after about ten days. Yield: 0.22 g. Elemental analysis: calcd (%) for C, 5.18; H, 1.88; N, 1.42; W, 48.53. Found (%) for C, 5.30; H, 1.77; N, 1.53; W, 48.41.

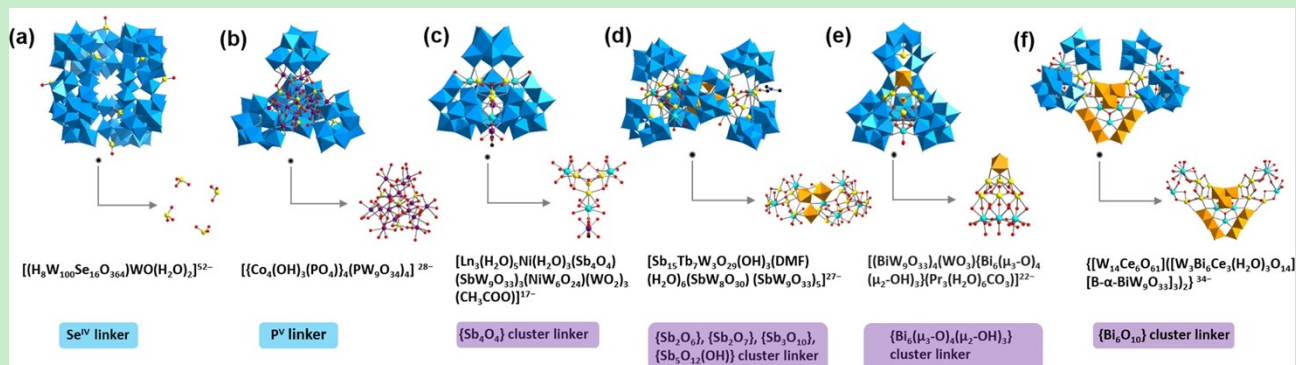

**Fig. S1** Structures of some representative dual-HA-directed HPOTs, where HAs work as discrete linkers or cluster linkers.

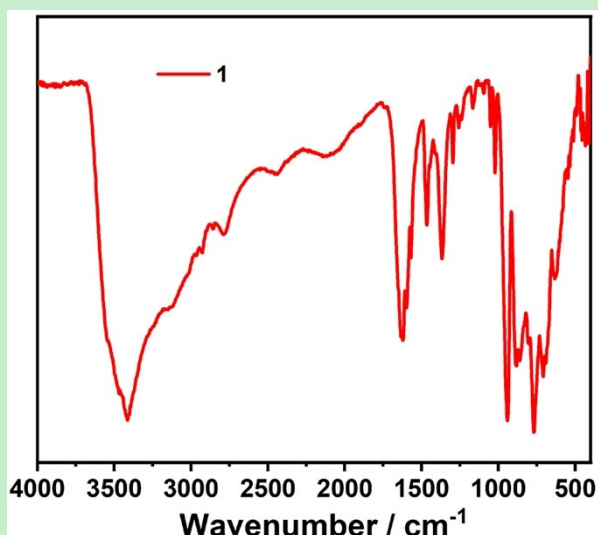

**Fig. S2** The IR spectrum of **1**.

IR spectrum of **1** was recorded on a Perkin-Elmer FT-IR spectrophotometer in the range of 4000–400  $cm^{-1}$  by palletization with KBr. In the low wavenumber ( $\nu < 1000\text{ cm}^{-1}$ ) region, several characteristic vibrations appearing at 941; 882, 861; 692, 632; and 547  $cm^{-1}$  are respectively ascribed to the  $W-O_t$ , corner-sharing  $W-O_b$ , edge-sharing  $W-O_c$  and Bi–O vibrations.<sup>1</sup> The band at 711  $cm^{-1}$  is assigned to Te–O<sub>a</sub> vibrations. In the high wavenumber ( $\nu > 1000\text{ cm}^{-1}$ ) region, the weak peaks at 1051 and 1022  $cm^{-1}$  can be assigned to the  $\delta_s(CH_3)$  vibration in H<sub>8</sub>BTHMMAP.<sup>2</sup> The bands located at 1367, 1466 and 1621 with a splitting peak at 1633  $cm^{-1}$  correspond to the COO<sup>-</sup> stretching vibrations of the Hpdca ligand.<sup>3</sup> In addition, the bands in the range 1650–1550  $cm^{-1}$  are ascribed to the C=C and C=N stretching vibrations of Hpdca ring. The signal at 2806  $cm^{-1}$  can be assigned as the C–H stretching vibrations, illustrating the presence of protonated dimethylamine cations. The broad vibration bands situated in the range of 3503–3306  $cm^{-1}$  and the peak at about 1630–1621  $cm^{-1}$  are response for water molecules.

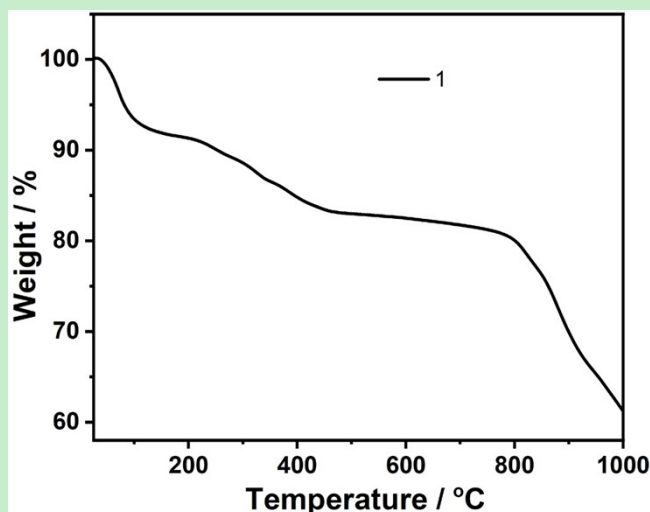

Fig. S3 The TG curve of **1**.

The thermal-stability measurement of **1** was performed under  $N_2$  atmosphere with a heating speed of  $10\text{ }^\circ\text{C}/\text{min}$  from 25 to  $1000\text{ }^\circ\text{C}$ . The TG curve of **1** displays a three-step weight loss. The first weight loss of 8.36% (calcd. 8.05%) from 25 to  $170\text{ }^\circ\text{C}$  belongs to the liberation of 44 lattice water molecules. The second weight loss of 10.71% (calcd. 11.16%) occurs from 170 to  $770\text{ }^\circ\text{C}$ , which correspond to the loss of 3 coordination water molecules, 4 dimethylamine molecules, 1.5  $[H_6BTHMMAP]$  molecules, 3 Hpdca ligands and dehydration of 8 protons. As temperatures rise to  $1000\text{ }^\circ\text{C}$ , the polyanion structure of **1** gradually disintegrates.

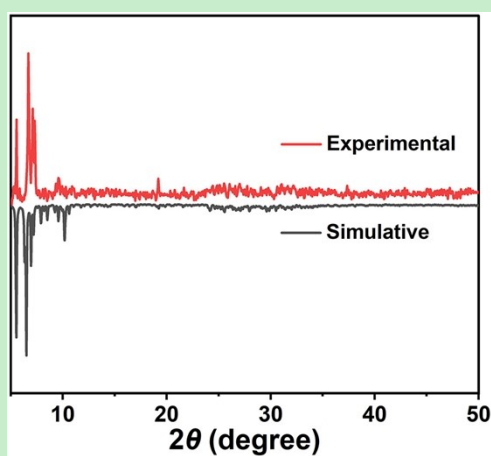

Fig. S4 Comparison of the simulative and experimental PXRD patterns of **1**.

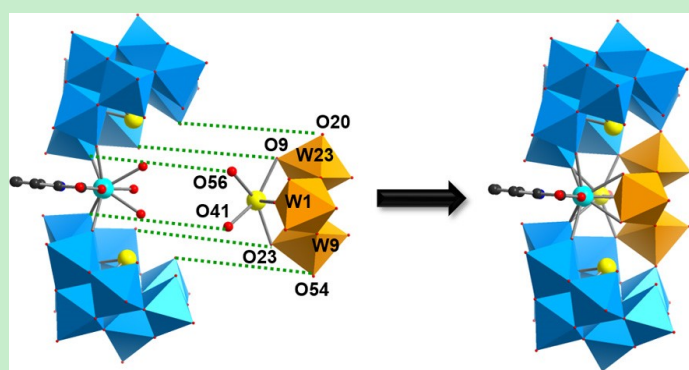

Fig. S5 Highlighting the bridging O atoms in connecting the dimeric midbody and  $[BiW_3(H_2O)O_{11}]^-$  moiety.

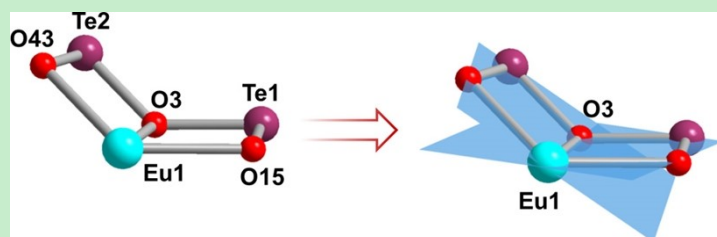

**Fig. S6** The  $[\text{EuTe}_2\text{O}_3]^{5+}$  cluster showing a folded quadrangle-shaped motif along "Eu1–O3" line.

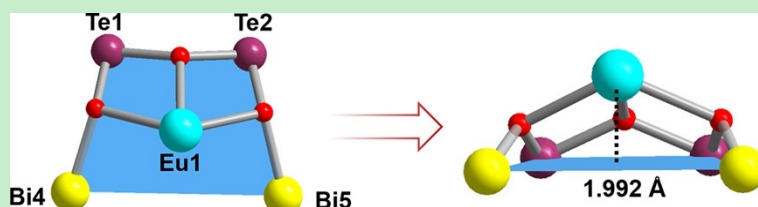

**Fig. S7** The almost coplanar arrangement of two  $\text{Te}^{\text{IV}}$  and two  $\text{Bi}^{\text{III}}$  atoms with  $\text{Eu}^{13+}$  ion located above the plane with a distance of 1.992 Å.

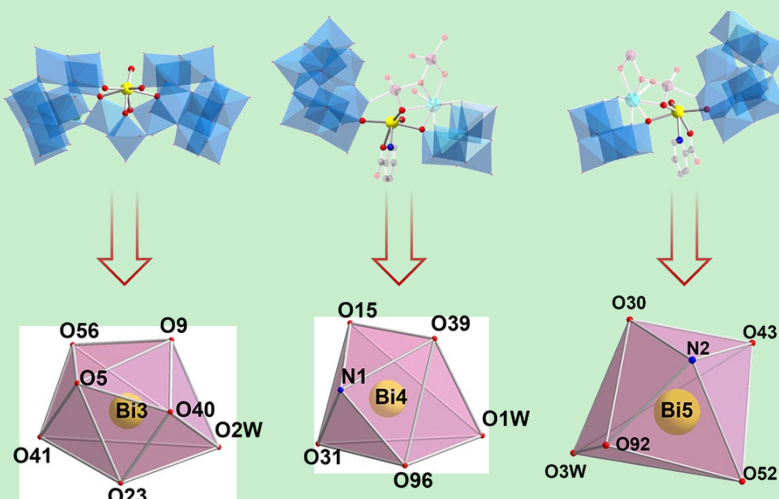

**Fig. S8** Coordination environments of  $\text{Bi}^{3\text{III}}\text{--Bi}^{5\text{III}}$  atoms.

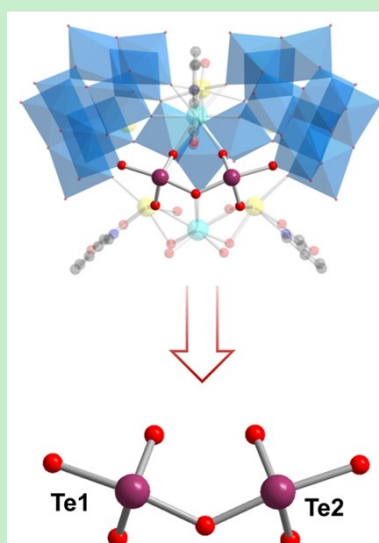

**Fig. S9** Coordination environments of  $\text{Te}^{1\text{IV}}$  and  $\text{Te}^{2\text{IV}}$  atoms.

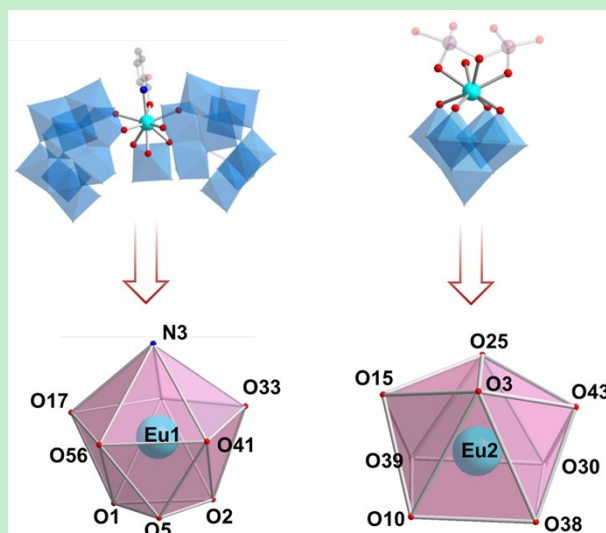

Fig. S10 Coordination geometries of  $\text{Eu}1^{3+}$  and  $\text{Eu}2^{3+}$  ions.

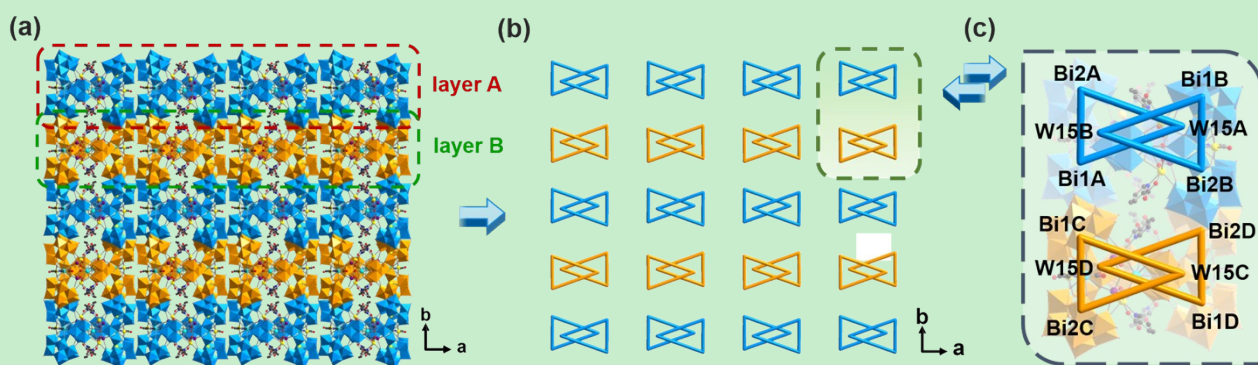

Fig. S11 (a) The stacking structure of **1a**. (b) The simplified diagram of stacking structure of **1a**. (c) The repeating unit in each layer. Symmetry code: A ( $2 - x, 1.5 + y, 1.5 - z$ ), B ( $2 + x, 2.5 - y, 1.5 + z$ ), C ( $2 - x, 2 - y, 2 - z$ ), D ( $2 + x, 1 + y, 1 + z$ ).

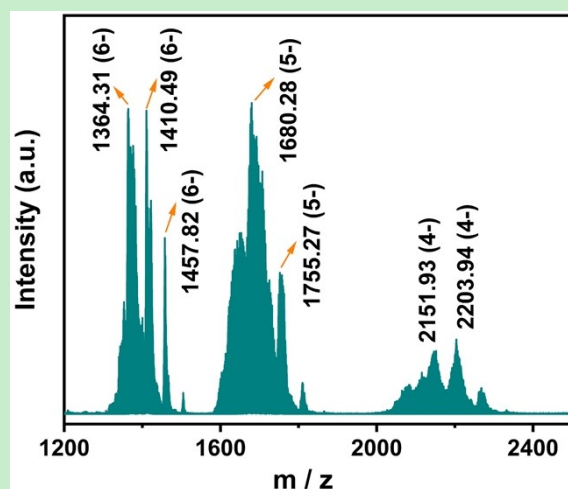

Fig. S12 The ESI-MS spectrum of **1** in aqueous solution.

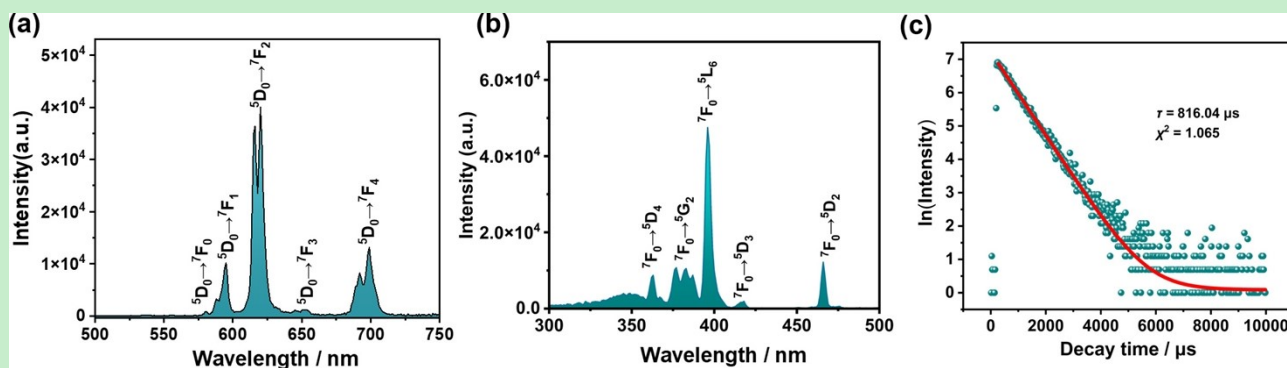

**Fig. S13** (a) The emission spectrum of **1** in aqueous solution ( $\lambda_{\text{ex}} = 397$  nm). (b) The excitation spectrum of **1** in aqueous solution ( $\lambda_{\text{em}} = 620$  nm). (c) The luminescence decay curve of **1** by monitoring the emission at 620 nm in aqueous solution.

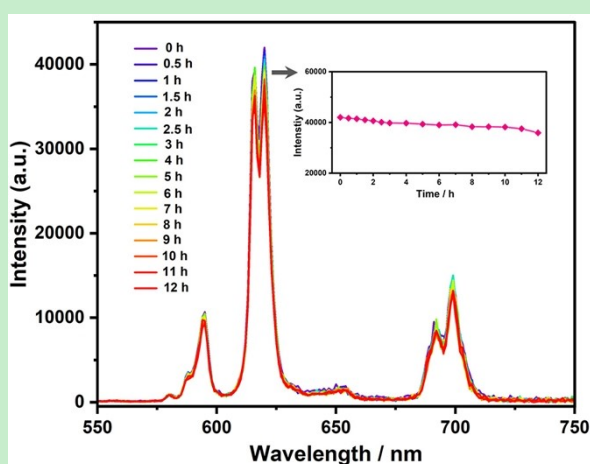

**Fig. S14** Time-dependent PL emission of **1** in water.

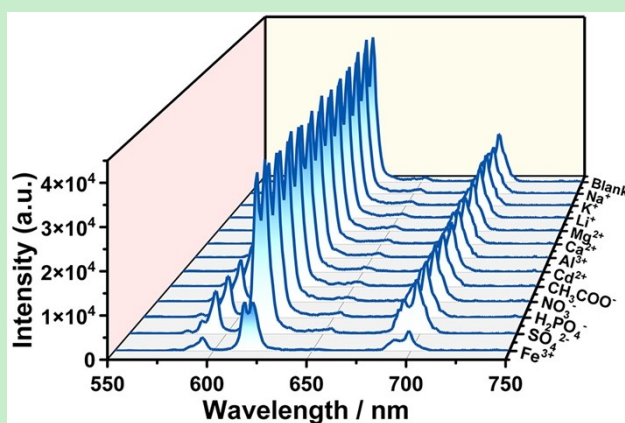

**Fig. S15** Fluorescence responses of the **1**-based sensor towards  $\text{Fe}^{3+}$  and other ions.



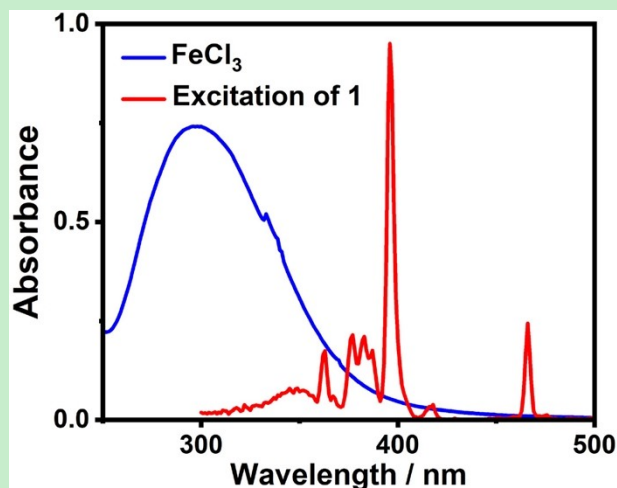

Fig. S16 Overlap between the UV-vis absorption spectra of FeCl<sub>3</sub> and the excitation spectra of 1.

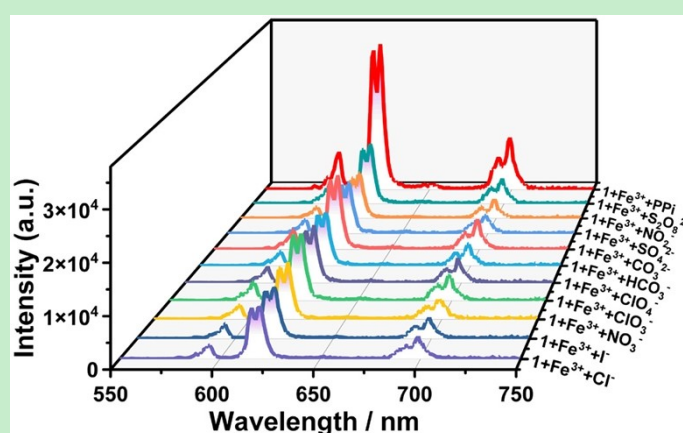

Fig. S17 Fluorescence responses of the Fe<sup>3+</sup>-quenched system with different anions.

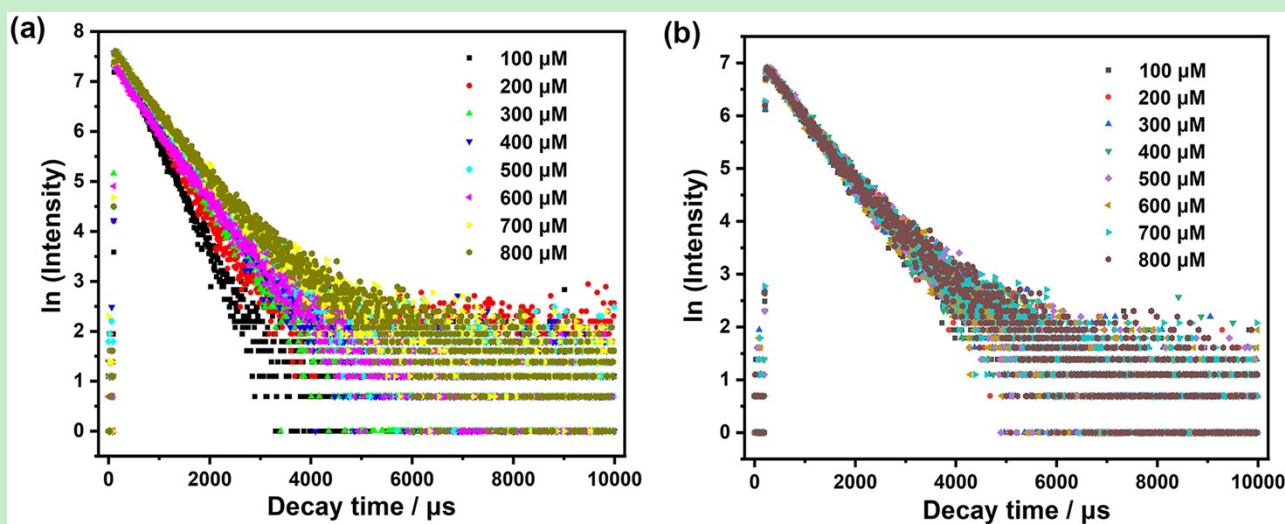

Fig. S18 (a) Lifetime decay curves of the Fe<sup>3+</sup>-quenched system under different concentrations of PPI. (b) Lifetime decay curves of 1 under different concentrations of PPI.

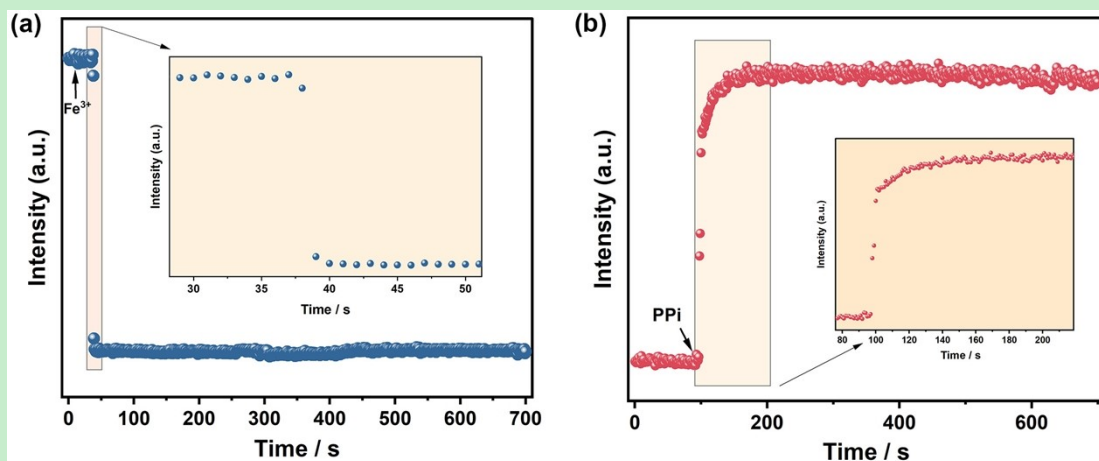

**Fig. S19** (a) Time scan of the PL response of **1** towards the addition of  $\text{Fe}^{3+}$  ( $400 \mu\text{M}$ ). (b) Time scan of the PL response of  $\text{Fe}^{3+}$ -quenched system towards the addition of PPI ( $800 \mu\text{M}$ ).

**Table S1.** X-ray diffraction crystallographic data and structure refinements for **1**.

| <b>1</b>                                      |                                                                                                                      |
|-----------------------------------------------|----------------------------------------------------------------------------------------------------------------------|
| Empirical formula                             | $\text{C}_{42.50}\text{H}_{184}\text{Bi}_5\text{Eu}_2\text{N}_{10}\text{Na}_3\text{O}_{160}\text{Te}_2\text{W}_{26}$ |
| Formula weight                                | 9849.09                                                                                                              |
| Temperature                                   | 150(2) K                                                                                                             |
| Wavelength                                    | 0.71073 Å                                                                                                            |
| Crystal system                                | Monoclinic                                                                                                           |
| space group                                   | $P2(1)/c$                                                                                                            |
| $a / \text{Å}$                                | 22.7494(5)                                                                                                           |
| $b / \text{Å}$                                | 29.3558(5)                                                                                                           |
| $c / \text{Å}$                                | 27.6875(7)                                                                                                           |
| $\alpha / ^\circ$                             | 90                                                                                                                   |
| $\beta / ^\circ$                              | 100.7660(10)                                                                                                         |
| $\gamma / ^\circ$                             | 90                                                                                                                   |
| $V / \text{Å}^3$                              | 18165.0(7)                                                                                                           |
| $Z$                                           | 4                                                                                                                    |
| $\rho_{\text{calc}} / \text{g cm}^{-3}$       | 3.601                                                                                                                |
| $\mu / \text{mm}^{-1}$                        | 22.330                                                                                                               |
| $F(000)$                                      | 17564                                                                                                                |
| Crystal size / $\text{mm}^3$                  | 0.18 x 0.15 x 0.10                                                                                                   |
| Radiation                                     | Mo $K\alpha$ ( $\lambda = 0.71073$ )                                                                                 |
| $2\theta$ range for data collection/ $^\circ$ | 1.89 to 25.10                                                                                                        |
|                                               | $-27 \leq h \leq 27$                                                                                                 |
| Index ranges                                  | $-33 \leq k \leq 35$                                                                                                 |
|                                               | $-33 \leq l \leq 33$                                                                                                 |
| Reflections collected                         | 233821                                                                                                               |
| Data/restraints/parameters                    | 32271 / 13 / 1843                                                                                                    |
| Goodness-of-fit on $F^2$                      | 1.047                                                                                                                |
| $R_1, wR_2$ ( $I > 2\sigma(I)$ )              | $R_1 = 0.0390, wR_2 = 0.0994$                                                                                        |
| $R_1, wR_2$ (all data)                        | $R_1 = 0.0549, wR_2 = 0.1076$                                                                                        |

**Table S2.** Assignment of peaks with proposed formula and charges.

| <i>z</i> | <i>m/z</i> (obs) | <i>m/z</i> (calc) | Assignment                                                                                                                                                                                                                                                                                                                                        |
|----------|------------------|-------------------|---------------------------------------------------------------------------------------------------------------------------------------------------------------------------------------------------------------------------------------------------------------------------------------------------------------------------------------------------|
| 6-       | 1364.31          | 1364.17           | [H <sub>2</sub> N(CH <sub>3</sub> ) <sub>2</sub> ] <sub>2</sub> Na <sub>3</sub> [Eu <sub>2</sub> Bi <sub>3</sub> (H <sub>2</sub> O) <sub>4</sub> Te <sub>2</sub> W <sub>3</sub> O <sub>14</sub> ][(W <sub>5</sub> O <sub>18</sub> )(BiW <sub>9</sub> O <sub>33</sub> ) <sub>2</sub> ] <sup>6-</sup>                                               |
|          | 1410.49          | 1410.88           | [H <sub>2</sub> N(CH <sub>3</sub> ) <sub>2</sub> ] <sub>3</sub> Na[Eu <sub>2</sub> Bi <sub>3</sub> (Hpdca) <sub>3</sub> (H <sub>2</sub> O) <sub>4</sub> Te <sub>2</sub> W <sub>3</sub> O <sub>14</sub> ][(W <sub>5</sub> O <sub>18</sub> )(BiW <sub>9</sub> O <sub>33</sub> ) <sub>2</sub> ] <sup>6-</sup>                                        |
|          | 1457.82          | 1457.94           | [H <sub>8</sub> BTHMMAP][H <sub>2</sub> N(CH <sub>3</sub> ) <sub>2</sub> ]HNa[Eu <sub>2</sub> Bi <sub>3</sub> (Hpdca) <sub>3</sub> (H <sub>2</sub> O) <sub>4</sub> Te <sub>2</sub> W <sub>3</sub> O <sub>14</sub> ][(W <sub>5</sub> O <sub>18</sub> )(BiW <sub>9</sub> O <sub>33</sub> ) <sub>2</sub> ] <sup>6-</sup>                             |
| 5-       | 1680.28          | 1680.64           | NaH <sub>5</sub> [Eu <sub>2</sub> Bi <sub>3</sub> (Hpdca) <sub>3</sub> (H <sub>2</sub> O) <sub>3</sub> Te <sub>2</sub> W <sub>3</sub> O <sub>14</sub> ][(W <sub>5</sub> O <sub>18</sub> )(BiW <sub>9</sub> O <sub>33</sub> ) <sub>2</sub> ] <sup>5-</sup>                                                                                         |
|          | 1755.27          | 1755.14           | [H <sub>8</sub> BTHMMAP][H <sub>2</sub> N(CH <sub>3</sub> ) <sub>2</sub> ] <sub>2</sub> HNa[Eu <sub>2</sub> Bi <sub>3</sub> (Hpdca) <sub>3</sub> (H <sub>2</sub> O) <sub>3</sub> Te <sub>2</sub> W <sub>3</sub> O <sub>14</sub> ][(W <sub>5</sub> O <sub>18</sub> )(BiW <sub>9</sub> O <sub>33</sub> ) <sub>2</sub> ] <sup>5-</sup>               |
| 4-       | 2151.93          | 2151.64           | [H <sub>2</sub> N(CH <sub>3</sub> ) <sub>2</sub> ] <sub>4</sub> Na <sub>2</sub> H[Eu <sub>2</sub> Bi <sub>3</sub> (Hpdca) <sub>3</sub> (H <sub>2</sub> O) <sub>3</sub> Te <sub>2</sub> W <sub>3</sub> O <sub>14</sub> ][(W <sub>5</sub> O <sub>18</sub> )(BiW <sub>9</sub> O <sub>33</sub> ) <sub>2</sub> ] <sup>4-</sup>                         |
|          | 2203.94          | 2204.18           | [H <sub>8</sub> BTHMMAP][H <sub>2</sub> N(CH <sub>3</sub> ) <sub>2</sub> ] <sub>2</sub> Na <sub>2</sub> H[Eu <sub>2</sub> Bi <sub>3</sub> (Hpdca) <sub>3</sub> (H <sub>2</sub> O) <sub>4</sub> Te <sub>2</sub> W <sub>3</sub> O <sub>14</sub> ][(W <sub>5</sub> O <sub>18</sub> )(BiW <sub>9</sub> O <sub>33</sub> ) <sub>2</sub> ] <sup>4-</sup> |

**Table S3.** The standard deviation for the 1-based fluorescence sensor.

|          | <i>I</i> (fluorescence intensity of the peak at 620 nm) | AVG. (Average of <i>I</i> ) | AVG. / <i>I</i> | Standard Deviation ( <i>s</i> ) |
|----------|---------------------------------------------------------|-----------------------------|-----------------|---------------------------------|
| Sample 1 | 43265.7031                                              |                             | 0.999           |                                 |
| Sample 2 | 43236.5859                                              | 43230.4544                  | 1.000           | 8.949 × 10 <sup>-4</sup>        |
| Sample 3 | 43189.0742                                              |                             | 1.001           |                                 |

According to the definition of  $LOD = 3s/k$ , bring  $s = 8.949 \times 10^{-4}$  and  $k = 0.00218$  into the above formula, the LOD can be calculated as 1.23  $\mu$ M.

**Table S4.** Detection results of Fe<sup>3+</sup> by 1-based fluorescence sensor in real samples.

| Sample      | Spiked ( $\mu$ M) | Measured ( $\mu$ M) | Recovery (%) | RSD (n = 3, %) |
|-------------|-------------------|---------------------|--------------|----------------|
| tap water   | 40                | 39.68               | 99.19        | 1.82           |
|             | 80                | 80.26               | 100.33       | 0.88           |
|             | 120               | 120.60              | 100.50       | 0.83           |
| lake water  | 40                | 39.60               | 99.00        | 0.55           |
|             | 80                | 79.37               | 99.21        | 0.27           |
|             | 120               | 120.21              | 100.18       | 0.94           |
| Human serum | 40                | 40.71               | 101.78       | 0.34           |
|             | 80                | 80.24               | 100.30       | 1.23           |
|             | 120               | 119.47              | 99.56        | 0.34           |

**Table S5.** Decay lifetimes of the 1-based sensor under different concentrations of Fe<sup>3+</sup>.

| Concentration of Fe <sup>3+</sup> / $\mu$ M | Decay time / $\mu$ s |
|---------------------------------------------|----------------------|
| Blank                                       | 816.04               |
| 50 $\mu$ M                                  | 762.34               |
| 100 $\mu$ M                                 | 703.51               |
| 150 $\mu$ M                                 | 642.19               |

|                   |        |
|-------------------|--------|
| 200 $\mu\text{M}$ | 566.58 |
| 250 $\mu\text{M}$ | 520.24 |
| 300 $\mu\text{M}$ | 468.98 |
| 350 $\mu\text{M}$ | 424.71 |
| 400 $\mu\text{M}$ | 400.14 |

**Table S6.** The standard deviation for the  $\text{Fe}^{3+}$ -quenched system.

|                 | $I$ (fluorescence intensity of the peak at 620 nm) | AVG. (Average of $I$ ) | AVG. / $I$ | Standard Deviation ( $s$ ) |
|-----------------|----------------------------------------------------|------------------------|------------|----------------------------|
| <b>Sample 1</b> | 11159.2373                                         |                        | 1.001      |                            |
| <b>Sample 2</b> | 11171.3379                                         | 11172.4189             | 1.000      | $1.231 \times 10^{-3}$     |
| <b>Sample 3</b> | 11186.6816                                         |                        | 0.999      |                            |

According to the definition of  $\text{LOD} = 3s/k$ , bring  $s = 1.231 \times 10^{-3}$  and  $k = 0.00282$  into the above formula, the LOD can be calculated as 2.16  $\mu\text{M}$ .

**Table S7.** Comparisons of the FL detection for  $\text{Fe}^{3+}$  and PPI by using **1**-based sensor with some reported results.

| Probe material              | Linear range of $\text{Fe}^{3+}$ | LOD ( $\mu\text{M}$ ) | Linear range of PPI  | LOD ( $\mu\text{M}$ ) | Ref.      |
|-----------------------------|----------------------------------|-----------------------|----------------------|-----------------------|-----------|
| RBCB                        | 10–100 $\mu\text{M}$             | 10.5                  | –                    | –                     | 4         |
| NCDs                        | 5–60 $\mu\text{M}$               | 1.9                   | –                    | –                     | 5         |
| Eu-MOF                      | 1–8 $\mu\text{M}$                | 2.31                  | –                    | –                     | 6         |
| DPYBT                       | 3.8–7.2 $\mu\text{M}$            | 3.04                  | –                    | –                     | 7         |
| $\text{Zn}^{2+}$ -Au/AgNCs  | –                                | –                     | 10–400 $\mu\text{M}$ | 3.2                   | 8         |
| $\text{Fe}^{3+}$ -AuNCs@GSH | –                                | –                     | 50–100 $\mu\text{M}$ | 28                    | 9         |
| $\text{Cu}^{2+}$ -AuNCs     | –                                | –                     | 0–30 $\mu\text{M}$   | 2                     | 10        |
| $\text{Cu}^{2+}$ -BCDs      | –                                | –                     | 25–500 $\mu\text{M}$ | 9.67                  | 11        |
| TA/ $\text{Fe}^{3+}$ -DCNPs | –                                | –                     | 0–2 mM               | 3.36                  | 12        |
| N-CDs                       | 5–40 $\mu\text{M}$               | 0.87                  | 0–20 $\mu\text{M}$   | 0.66                  | 13        |
| carbon dots                 | 0.5–400 $\mu\text{M}$            | 0.21                  | 2–600 $\mu\text{M}$  | 0.86                  | 14        |
| PDA-GNPs                    | 0.1–300 $\mu\text{M}$            | 0.03                  | 2–12 $\mu\text{M}$   | 0.6                   | 15        |
| N-doped carbon quantum dots | 0–600 $\mu\text{M}$              | 1.2                   | 5–500 $\mu\text{M}$  | 0.5                   | 16        |
| N-CDs                       | 3–30 $\mu\text{M}$               | 2.71                  | 2–12 $\mu\text{M}$   | 1.12                  | 17        |
| <b>1</b>                    | 0–150 $\mu\text{M}$              | 1.23                  | 0–700 $\mu\text{M}$  | 2.16                  | This work |

**Table S8.** Decay lifetimes of the  $\text{Fe}^{3+}$ -quenched system under different concentrations of PPI.

| Concentration of PPI / $\mu\text{M}$ | $\tau_1$ / $\mu\text{s}$ | $A_1$   | Percentage / % | $\tau_2$ / $\mu\text{s}$ | $A_2$  | Percentage / % | $\tau$ |
|--------------------------------------|--------------------------|---------|----------------|--------------------------|--------|----------------|--------|
| 100 $\mu\text{M}$                    | 457.29                   | 2041.85 | 100            | /                        | /      | /              | 457.29 |
| 200 $\mu\text{M}$                    | 530.59                   | 1946.98 | 100            | /                        | /      | /              | 530.59 |
| 300 $\mu\text{M}$                    | 632.09                   | 1876.98 | 100            | /                        | /      | /              | 632.09 |
| 400 $\mu\text{M}$                    | 535.01                   | 1209.37 | 54.92          | 832.75                   | 637.69 | 45.08          | 669.22 |
| 500 $\mu\text{M}$                    | 537.88                   | 1284.86 | 52.72          | 922.56                   | 671.77 | 47.28          | 719.75 |

|                   |        |         |       |         |        |       |        |
|-------------------|--------|---------|-------|---------|--------|-------|--------|
| 600 $\mu\text{M}$ | 522.53 | 863.37  | 47.09 | 922.48  | 549.43 | 52.91 | 734.13 |
| 700 $\mu\text{M}$ | 633.45 | 1643.11 | 76.12 | 1330.42 | 245.45 | 23.88 | 799.90 |
| 800 $\mu\text{M}$ | 647.88 | 1697.36 | 76.72 | 1435.08 | 232.48 | 23.28 | 831.11 |

With the increase of PPI, the PL decay curves are more suitable to be fitted by second-order exponential function as  $I = A_1 \exp(-t/\tau_1) + A_2 \exp(-t/\tau_2)$  ( $\tau_1$  and  $\tau_2$  are the fast and slow components of the luminescence lifetimes;  $A_1$  and  $A_2$  are the pre-exponential factors). The average lifetime is determined by the given formula  $\tau = (A_1\tau_1^2 + A_2\tau_2^2)/(A_1\tau_1 + A_2\tau_2)$ .<sup>18</sup>

**Table S9.** Decay lifetimes of the 1-based sensor under different concentrations of PPI.

| Concentration of PPI / $\mu\text{M}$ | $\tau_1 / \mu\text{s}$ | $A_1$  | Percentage / % | $\tau_2 / \mu\text{s}$ | $A_2$  | Percentage / % | $\tau$ |
|--------------------------------------|------------------------|--------|----------------|------------------------|--------|----------------|--------|
| 100 $\mu\text{M}$                    | 828.2                  | 938.36 | 100            | /                      | /      | /              | 828.20 |
| 200 $\mu\text{M}$                    | 831.77                 | 959.92 | 100            | /                      | /      | /              | 831.77 |
| 300 $\mu\text{M}$                    | 835.80                 | 945.74 | 100            | /                      | /      | /              | 835.80 |
| 400 $\mu\text{M}$                    | 840.21                 | 992.66 | 100            | /                      | /      | /              | 840.21 |
| 500 $\mu\text{M}$                    | 520.70                 | 462.17 | 31.04          | 1000.00                | 534.62 | 68.96          | 851.22 |
| 600 $\mu\text{M}$                    | 693.09                 | 692.61 | 65.60          | 1233.65                | 204.06 | 34.40          | 879.05 |
| 700 $\mu\text{M}$                    | 709.05                 | 819.33 | 75.48          | 1491.04                | 126.60 | 24.52          | 900.83 |
| 800 $\mu\text{M}$                    | 615.85                 | 615.85 | 51.95          | 1189.31                | 313.55 | 48.05          | 891.41 |

With the increase of PPI, the PL decay curves are more suitable to be fitted by second-order exponential function as  $I = A_1 \exp(-t/\tau_1) + A_2 \exp(-t/\tau_2)$  ( $\tau_1$  and  $\tau_2$  are the fast and slow components of the luminescence lifetimes;  $A_1$  and  $A_2$  are the pre-exponential factors). The average lifetime is determined by the given formula  $\tau = (A_1\tau_1^2 + A_2\tau_2^2)/(A_1\tau_1 + A_2\tau_2)$ .<sup>18</sup>

**Table S10.** Detection results of PPI in human serum sample by using  $\text{Fe}^{3+}$ -quenched system.

| Sample      | Spiked ( $\mu\text{M}$ ) | Measure ( $\mu\text{M}$ ) | Recovery (%) | RSD (n = 3, %) |
|-------------|--------------------------|---------------------------|--------------|----------------|
| Human serum | 80                       | 82.06                     | 102.58       | 1.48           |
|             | 160                      | 159.51                    | 99.69        | 0.73           |
|             | 240                      | 240.57                    | 100.24       | 0.56           |

## References

- [1] J.-C. Liu, Q. Han, L.-J. Chen, J.-W. Zhao, C. Streb and Y.-F. Song, Aggregation of giant cerium–bismuth tungstate clusters into a 3D porous framework with high proton conductivity, *Angew. Chem. Int. Ed.*, 2018, **57**, 8416.
- [2] M. V. Kirillova, C. I. M. Santos, V. André, T. A. Fernandes, S. S. P. Dias and A. M. Kirillov, Self-assembly generation, structural features, and oxidation catalytic properties of new aqua-soluble copper(II)-aminoalcohol derivatives, *Inorg. Chem. Front.*, 2017, **4**, 968.
- [3] X. Su, Y. Z. He, K. H. Li, M. Wang, W. Tang, S. H. Zhang, P. T. Ma, J. Y. Niu and J. P. Wang, Unleashing the power of directed electron transfer: unraveling the potential of  $\{\text{PV}_4\}_2$  in heterogeneous photocatalysis, *Inorg. Chem.*

*Front.*, 2024, **11**, 2965.

- [4] P. S. Nayab and M. Shkir, Rapid and simultaneous detection of Cr (III) and Fe (III) ions by a new naked eye and fluorescent probe and its application in real samples, *Sens. Actuators B Chem.*, 2017, **251**, 951.
- [5] J. J. Cui, X. X. Zhu, Y. P. Liu, L. M. Liang, Y. S. Peng, S. G. Wu and Y. Zhao, N-doped carbon dots as fluorescent "Turn-Off" nanosensors for ascorbic acid and Fe<sup>3+</sup> detection, *ACS Appl. Nano Mater.*, 2022, **5**, 7268.
- [6] T.-Q. Lu, X.-T. Wang, L.-T. Cheng, C. Chen, H. Y. Shi, J. Zheng and X.-Y. Zheng, Soft metal-organic frameworks based on {Na@Ln<sub>6</sub>} as a secondary building unit featuring a magnetocaloric effect and fluorescent sensing for cyclohexane and Fe<sup>3+</sup>, *Cryst. Growth Des.*, 2021, **21**, 7065.
- [7] J. N. Qian, N. Huang, Q. Y. Lu, C. Wen and J. B. Xia, A novel D-A-D-typed rod-like fluorescent material for efficient Fe(III) and Cr(VI) detection: Synthesis, structure and properties, *Sens. Actuators B Chem.*, 2020, **320**, 128377.
- [8] Z. L. Lei, J. Zhou, M. Liang, Y. Xiao and Z. H. Liu, Aggregation-induced emission of Au/Ag alloy nanoclusters for fluorescence detection of inorganic pyrophosphate and pyrophosphatase activity, *Front. Bioeng. Biotechnol.*, 2021, **8**, 628181.
- [9] P.-H. Li, J.-Y. Lin, C.-T. Chen, W.-R. Ciou, P.-H. Chan, L. Y. Luo, H.-Y. Hsu, E. W.-G. Diao and Y.-C. Chen, Using gold nanoclusters as selective luminescent probes for phosphate-containing metabolites, *Anal. Chem.*, 2012, **84**, 5484.
- [10] Y. Chen, W. Y. Li, Y. Wang, X. D. Yang, J. Chen, Y. N. Jiang, C. Yu and Q. Lin, Cysteine-directed fluorescent gold nanoclusters for the sensing of pyrophosphate and alkaline phosphatase, *J. Mater. Chem. C*, 2014, **2**, 4080.
- [11] Z.-X. Wang, X.-H. Yu, F. Li, F.-Y. Kong, W.-X. Lv, D.-H. Fan and W. Wang, Preparation of boron-doped carbon dots for fluorometric determination of Pb(II), Cu(II) and pyrophosphate ions, *Microchim. Acta.*, 2017, **184**, 4775e4783.
- [12] Y. Q. Su, L. Y. Ye, J. Y. Gu, L. Y. Zhao, Y. Y. Zhou and J. J. Peng, Sensing and imaging of PPI in vivo using lanthanide-based second near-infrared luminescent probes, *J. Mater. Chem. B*, 2022, **10**, 1055.
- [13] A. Yu, Y. Tang, K. Li, J. Gao, Y. Zheng and Z. Zeng, Tunable photoluminescence studies based on blue-emissive carbon dots and sequential determination of Fe(III) and pyrophosphate ions, *Spectrochim. Acta Mol. Biomol. Spectrosc.*, 2019, **222**, 117231.
- [14] Y. P. Hu, Z. J. Gao, J. Yang, H. Chen, L. Han, Environmentally benign conversion of waste polyethylene terephthalate to fluorescent carbon dots for "on-off-on" sensing of ferric and pyrophosphate ions, *J. Colloid Interface Sci.*, 2019, **538**, 481.
- [15] L. Tang, S. Mo, S. G. Liu, L. L. Liao, N. B. Li, H. Q. Luo, Synthesis of fluorescent polydopamine nanoparticles by Michael addition reaction as an analysis platform to detect iron ions and pyrophosphate efficiently and construction of an IMPLICATION logic gate, *Sens. Actuators B Chem.*, 2018, **255**, 754.
- [16] F. S. Niu, Y.-L. Ying, X. Hua, Y. S. Niu, Y. H. Xu and Y.-T. Long, Electrochemically generated green-fluorescent N-doped carbon quantum dots for facile monitoring alkaline phosphatase activity based on the Fe<sup>3+</sup>-mediating ON-OFF-ON-OFF fluorescence principle, *Carbon*, 2018, **127**, 340.
- [17] L. Y. Jin, X. S. Wang, X. Y. Liu, Y. L. Jiang and J. Shen, Preparation of novel fluorescent probe based on carbon

dots for sensing and imaging Fe(III) and pyrophosphate in cells and zebrafish, *Anal. and Bioanal. Chem.*, 2022, **414**, 7609.

- [18] T. Fujii, K. Kodaira, O. Kawauchi, N. Tanaka, H. Yamashita and M. Anpo, Photochromic behavior in the fluorescence spectra of 9-anthrol encapsulated in Si–Al glasses prepared by the sol–gel method, *J. Phys. Chem. B*, 1997, **101**, 10631.
